# Supplementary material for: Synthesis, characterization and micellization of amphiphilic polyethylene-b-polyphosphoester block copolymers
Source: Royal Society of Chemistry journal article supplement (doi:10.1039/c5ra08191b), 2015-01-01
Supplement: c5ra08191b1.pdf [file c5ra08191b1.pdf]

## Supporting Information

### **Synthesis, characterization and micellization of amphiphilic polyethylene-*b*-polyphosphoester block copolymers**

Haiyang Gao\*, Yinxin Tan, Qirui Guan, Tao Cai, Guodong Liang, and Qing Wu

PCFM Lab, GD HPPC Lab, DSAPM Lab, Institute of Polymer Science, School of Chemistry and Chemical Engineering, Sun Yat-Sen University, Guangzhou 510275, China.

\*Corresponding authors: H. Gao, [gaohy@mail.sysu.edu.cn](mailto:gaohy@mail.sysu.edu.cn)

## 1 Synthesis and characterization of EEP

2-Ethoxy-2-oxo-1,3,2-dioxaphospholane (EEP) was synthesized according to the reported method.<sup>1</sup>

**Scheme S1.** Synthetic route of EEP.

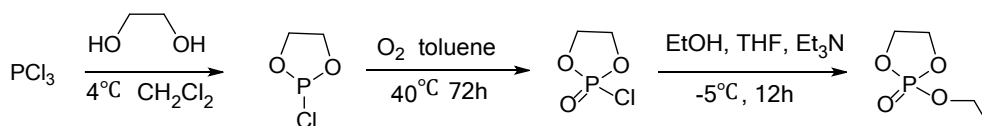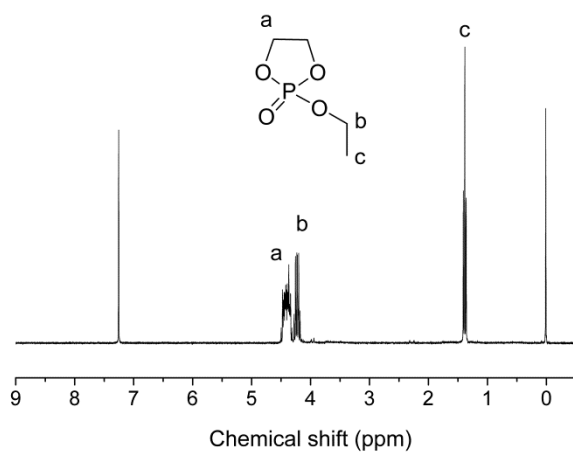

**Figure S1.**  $^1\text{H}$  NMR spectrum of EEP

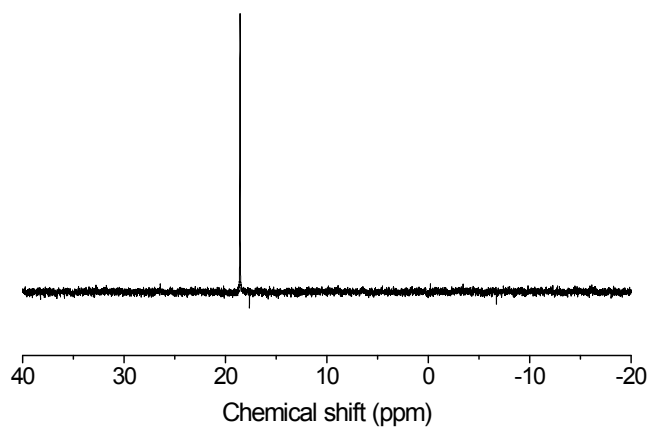

**Figure S2.**  $^{31}\text{P}$  NMR spectrum of EEP

## 2 Synthesis and characterization of MeEP

2-Methyl-2-oxo-1,3,2-dioxaphospholane (MeEP) was synthesized according to the reported method.<sup>2</sup>

**Scheme S2.** Synthetic route of MeEP.

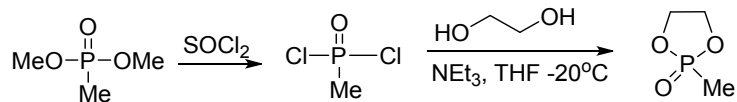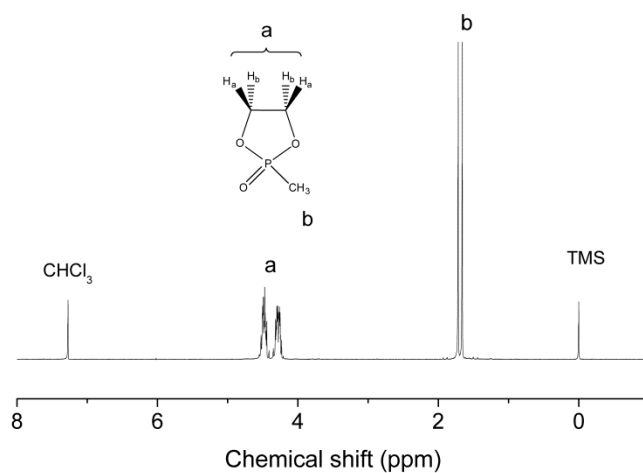

**Figure S3.** <sup>1</sup>H NMR spectrum of MeEP.

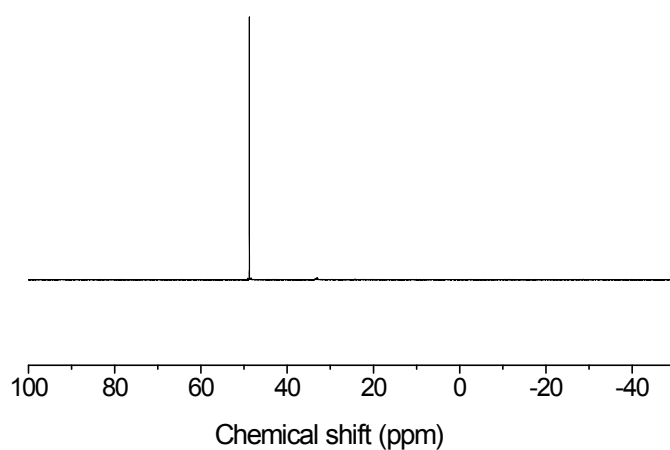

**Figure S4.** <sup>31</sup>P NMR spectrum of MeEP.

### 3 Synthesis and characterization of TU

Thiourea (TU) was synthesized according to a reported method.<sup>3</sup>

**Scheme S3.** Synthetic route of TU.

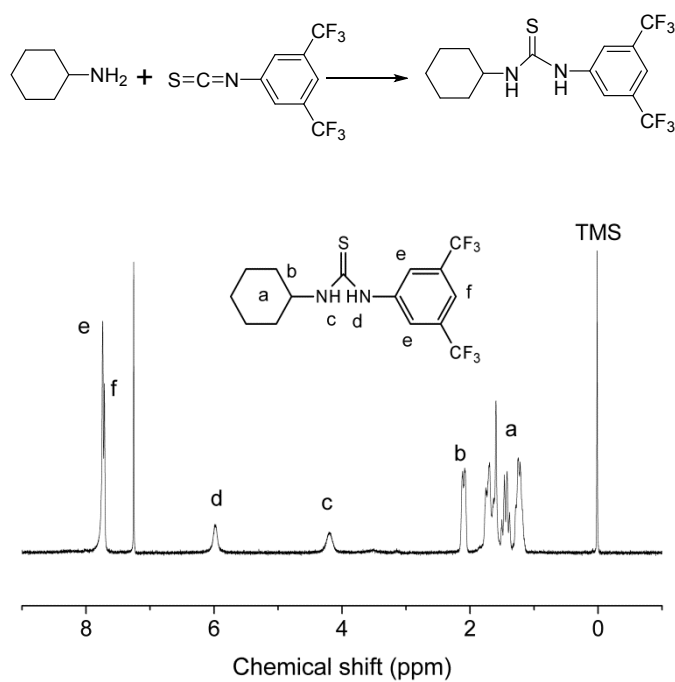

**Figure S5.** <sup>1</sup>H NMR spectrum of TU

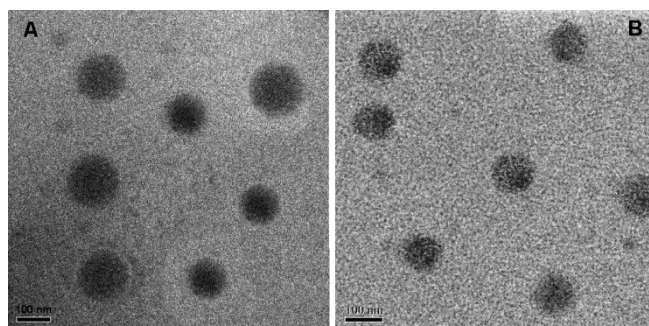

**Figure S6.** TEM images of p PTX-loaded micelles (A: PE<sub>680</sub>-*b*-PEEP<sub>131</sub>; B: PE<sub>680</sub>-*b*-PMeEP<sub>112</sub>).

### References:

- (1) J. Libiszowski, K. Kałużynski, S. Penczek, *J. Polym. Sci., Part A: Polym. Chem.*, 1978, **16**, 1275-1283.

- (2) T. Steinbach, S. Ritz, F. R. Wurm, *ACS Macro Lett.*, 2014, **3**, 244-248.
- (3) R. C. Pratt, B. G. G. Lohmeijer, D. A. Long, P. N. P. Lundberg, A. P. Dove, H. Li, C. G. Wade, R. M. Waymouth, J. L. Hedrick, *Macromolecules*, 2006, **39**, 7863-7871.
